# Supplementary material
Source: publisher figshare collection journal article supplement (https://frontiersin.figshare.com/ndownloader/files/13894034)
Supplement: Supplementary file [file 13894034]

**Supplementary Table 6: Statistics of the vascular bundle length in *G. bachemiana*.** Vascular bundle (VB) length is measured for 10 helical loops (μm). Significant differences between the steady (S), unreleased (U), and released (R) states were calculated with a Mann-Whitney-U-Test;  $P \leq 0.005$  (bold); abbreviations according to Tab. S3.

|           | State | N   | Mean  | se   | K-S-Test | Sig.         | Tested groups | df      | U-Test                     |
|-----------|-------|-----|-------|------|----------|--------------|---------------|---------|----------------------------|
| Upper VBs | S     | 114 | 45.47 | 1.04 | 0.145    | <b>0.000</b> | S / U         | 114/77  | <b>U = 3001; P = 0.000</b> |
|           | U     | 77  | 53.72 | 2.05 | 0.220    | <b>0.000</b> | U / R         | 77/52   | U = 1668; P = 0.109        |
|           | R     | 52  | 48.29 | 1.41 | 0.146    | <b>0.007</b> | R / S         | 52/114  | <b>U = 2279; P = 0.017</b> |
| Lower VB  | S     | 143 | 51.86 | 0.90 | 0.129    | <b>0.000</b> | S / U         | 143/150 | <b>U = 8849; P = 0.010</b> |
|           | U     | 150 | 55.99 | 1.15 | 0.186    | <b>0.000</b> | U / R         | 150/101 | <b>U = 3571; P = 0.000</b> |
|           | R     | 101 | 68.46 | 1.64 | 0.119    | <b>0.001</b> | R / S         | 101/143 | <b>U = 2539; P = 0.000</b> |
